# Supplementary material for: K2MnGe3S8: a new multifunctional semiconductor featuring [MnGe3S8]2− layers and demonstrating interesting nonlinear optical response and antiferromagnetic properties
Source: Royal Society of Chemistry journal article supplement (doi:10.1039/c8tc03694b), 2018-01-01
Supplement: c8tc03694b1.pdf [file c8tc03694b1.pdf]

## Supporting Information

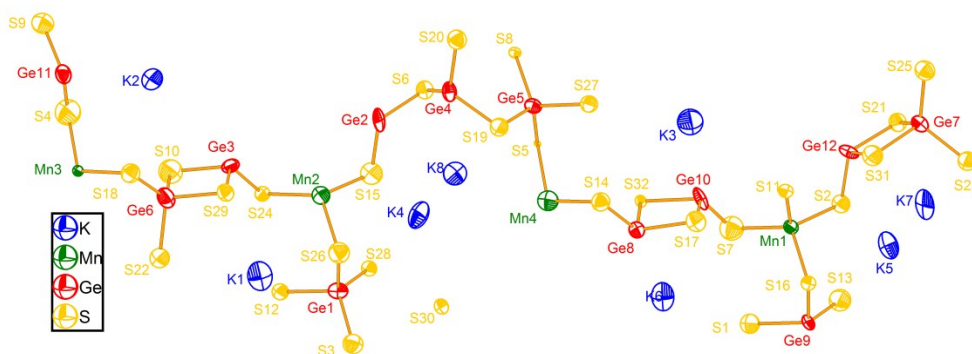

**Figure S1.** asymmetric unit of  $\text{K}_2\text{MnGe}_3\text{S}_8$

**Table S1** Atomic coordinates ( $\times 10^4$ ) and equivalent isotropic displacement parameters in  $\text{\AA}^2 \times 10^3$  of  $\text{K}_2\text{MnGe}_3\text{S}_8$

| Atom | Oxidation | Wyckoff    | <i>x</i>    | <i>y</i>   | <i>z</i>   | $U_{eq}$ |
|------|-----------|------------|-------------|------------|------------|----------|
| K1   | +1        | 2 <i>a</i> | 8038(4)     | 9126.1(18) | 5390.8(7)  | 31.7(6)  |
| K2   | +1        | 2 <i>a</i> | -1568(3)    | 5701.5(19) | 5964.0(6)  | 26.4(6)  |
| K3   | +1        | 2 <i>a</i> | 3027(3)     | 9062(2)    | 394.2(7)   | 34.7(3)  |
| K4   | +1        | 2 <i>a</i> | 6161(3)     | 8673(2)    | 3520.8(7)  | 30.9(6)  |
| K5   | +1        | 2 <i>a</i> | 11094(3)    | 8656.9(18) | -1476.7(6) | 25.1(6)  |
| K6   | +1        | 2 <i>a</i> | 13481(3)    | 5673.4(18) | 954.6(6)   | 28.6(6)  |
| K7   | +1        | 2 <i>a</i> | 10651(3)    | 5341.0(18) | -2094.3(6) | 28.7(6)  |
| K8   | +1        | 2 <i>a</i> | 5685(3)     | 5335(2)    | 2900.4(7)  | 32.1(6)  |
| Mn1  | +2        | 2 <i>a</i> | 10113.2(17) | 7105.9(10) | -530.0(4)  | 11.1(2)  |

|      |    |    |             |            |            |           |
|------|----|----|-------------|------------|------------|-----------|
| Mn2  | +2 | 2a | 5115.4(19)  | 7109.7(12) | 4467.9(4)  | 17.7(2)   |
| Mn3  | +2 | 2a | 2047.8(16)  | 7221.4(9)  | 7034.5(3)  | 6.6(2)    |
| Mn4  | +2 | 2a | 6981(2)     | 7171       | 2033.2(4)  | 22.2(3)   |
| Ge1  | +4 | 2a | 10104.5(12) | 7430.7(7)  | 4515.2(3)  | 12.7(2)   |
| Ge2  | +4 | 2a | 1817.3(14)  | 6529.6(8)  | 3645.4(3)  | 15.5(2)   |
| Ge3  | +4 | 2a | 3076.9(12)  | 6752.3(8)  | 5360.0(3)  | 15.2(2)   |
| Ge4  | +4 | 2a | 364.2(13)   | 7604.9(8)  | 2864.0(3)  | 13.5(2)   |
| Ge5  | +4 | 2a | 2000.7(12)  | 6932.7(8)  | 1965.4(3)  | 12.25(18) |
| Ge6  | +4 | 2a | 3819.4(14)  | 7869.5(8)  | 6172.7(3)  | 19.0(3)   |
| Ge7  | +4 | 2a | 5384.6(13)  | 7609.0(9)  | -2136.5(3) | 16.7(3)   |
| Ge8  | +4 | 2a | 8831.4(13)  | 7885.4(8)  | 1170.5(3)  | 12.12(18) |
| Ge9  | +4 | 2a | 15112.3(13) | 7406.3(8)  | -486.1(3)  | 14.1(2)   |
| Ge10 | +4 | 2a | 8142.1(14)  | 6754.5(8)  | 365.2(3)   | 15.5(2)   |
| Ge11 | +4 | 2a | -3005.0(13) | 6944.6(8)  | 6959.9(3)  | 15.5(2)   |
| Ge12 | +4 | 2a | 6826.8(13)  | 6518.3(8)  | -1351.6(3) | 14.3(2)   |
| S1   | -2 | 2a | 15150(3)    | 6528(2)    | 110.8(7)   | 20.2(3)   |
| S2   | -2 | 2a | 9693(3)     | 6092.5(19) | -1162.6(6) | 16.4(3)   |
| S3   | -2 | 2a | 12571(3)    | 8407(2)    | 4514.2(7)  | 20.4(3)   |
| S4   | -2 | 2a | -519(4)     | 5888(3)    | 6955.9(8)  | 34.4(3)   |
| S5   | -2 | 2a | 4459(2)     | 5899.3(15) | 1964.3(5)  | 1.8(3)    |
| S6   | -2 | 2a | 881(3)      | 5799.9(19) | 3053.3(6)  | 16.0(3)   |
| S7   | -2 | 2a | 10245(4)    | 5998(2)    | 68.1(7)    | 29.6(3)   |

|     |    |    |          |            |            |         |
|-----|----|----|----------|------------|------------|---------|
| S8  | -2 | 2a | -474(3)  | 5886.9(17) | 1999.0(5)  | 6.8(3)  |
| S9  | -2 | 2a | -5375(3) | 5919(2)    | 7024.9(7)  | 25.2(3) |
| S10 | -2 | 2a | 3235(4)  | 6083(2)    | 5991.5(8)  | 29.9(3) |
| S11 | -2 | 2a | 7601(3)  | 8443.8(18) | -502.5(6)  | 10.6(3) |
| S12 | -2 | 2a | 10157(3) | 6480.6(19) | 5101.6(6)  | 14.5(3) |
| S13 | -2 | 2a | 14780(3) | 6004(2)    | -934.6(7)  | 24.6(3) |
| S14 | -2 | 2a | 6782(3)  | 8638.0(19) | 1525.1(6)  | 17.4(3) |
| S15 | -2 | 2a | 4746(4)  | 6134(2)    | 3833.8(7)  | 24.7(3) |
| S16 | -2 | 2a | 12589(3) | 8476.6(18) | -534.0(6)  | 10.7(3) |
| S17 | -2 | 2a | 8509(3)  | 8579(2)    | 540.5(7)   | 20.7(3) |
| S18 | -2 | 2a | 1928(3)  | 8642(2)    | 6530.9(7)  | 18.3(3) |
| S19 | -2 | 2a | 2283(3)  | 8270.5(19) | 2436.8(6)  | 16.6(3) |
| S20 | -2 | 2a | -2535(3) | 8107.6(19) | 2684.7(7)  | 18.9(3) |
| S21 | -2 | 2a | 5926(3)  | 5838(2)    | -1970.7(7) | 16.6(3) |
| S22 | -2 | 2a | 6882(3)  | 7977(2)    | 6384.9(7)  | 20.3(3) |
| S23 | -2 | 2a | 7407(3)  | 8229.8(19) | -2537.8(7) | 18.0(3) |
| S24 | -2 | 2a | 5155(3)  | 5872.9(18) | 5044.7(6)  | 11.2(3) |
| S25 | -2 | 2a | 2464(3)  | 7976(2)    | -2297.1(7) | 19.9(3) |
| S26 | -2 | 2a | 7664(3)  | 8466(2)    | 4458.5(7)  | 22.1(3) |
| S27 | -2 | 2a | 1824(3)  | 8015.8(19) | 1401.9(6)  | 15.2(3) |
| S28 | -2 | 2a | 9771(3)  | 6004.4(18) | 4071.3(6)  | 11.8(3) |
| S29 | -2 | 2a | 3670(3)  | 8533.0(19) | 5547.3(6)  | 14.9(3) |

|     |    |      |          |            |            |         |
|-----|----|------|----------|------------|------------|---------|
| S30 | -2 | $2a$ | 11276(3) | 8318.4(18) | 3472.0(6)  | 11.1(3) |
| S31 | -2 | $2a$ | 6396(3)  | 8340(2)    | -1524.8(7) | 20.9(3) |
| S32 | -2 | $2a$ | 8141(3)  | 6082.0(16) | 987.9(5)   | 6.8(3)  |

---

$U_{eq}$  is defined as one third of the trace of the orthogonalized  $U_{ij}$  tensor.
